# Supplementary material for: Injectable hydrogel with dual-sensitive behavior for targeted delivery of oncostatin M to improve cardiac restoration after myocardial infarction
Source: Royal Society of Chemistry journal article supplement (doi:10.1039/d2tb00623e), 2022-01-01
Supplement: d2tb00623e1.pdf [file d2tb00623e1.pdf]

## Supplementary Materials

### **Injectable Hydrogel with Dual-Sensitive Behavior for Targeted Delivery of Oncostatin M to Improve Cardiac Restoration after Myocardial Infarction**

Yong-liang Jiang<sup>a, 1</sup>, Shiwei Niu<sup>b, 1</sup>, Zhi Lin<sup>a</sup>, Limei Li<sup>b</sup>, Ping Yang<sup>c</sup>, Peng Rao<sup>a</sup>, Lin Yang<sup>a</sup>, Lihong Jiang<sup>d, \*</sup>, Lin Sun<sup>a, \*</sup>.

<sup>a</sup> Department of Cardiology, the Second Affiliated Hospital of Kunming Medical University, Kunming 650101, China

<sup>b</sup> Yunnan Key Laboratory of Stem Cell and Regenerative Medicine, Science and Technology Achievement Incubation Center, Kunming Medical University, Kunming 650500, PR China

<sup>c</sup> Faculty of Basic Medical Science, Kunming Medical University, Kunming 650500, PR China

<sup>d</sup> Department of Cardiovascular Surgery, the First People's Hospital of Yunnan Province, the Affiliated Hospital of Kunming University of Science and Technology, Kunming, 650500, PR China

\* Correspondence authors.

E-mail: sunlinkm@sina.com (L.S.), jianglihong\_yayy@163.com (L. Jiang).

<sup>1</sup> These authors contributed equally to the study.

## 1. Materials and Methods

### 1.1. Western blotting

After treatment, the cells were lysed with 1:100 (v/v) PMSF-modified RIPA buffer. After total protein content was determined, the samples were subjected to 10% sodium dodecyl sulphate-polyacrylamide gel electrophoresis (SDS-PAGE). The isolated protein bands were transferred to polyvinylidene fluoride (PVDF) membranes and incubated at 4 °C overnight with GAPDH (1: 4000) and p-gp130 (1:500) primary antibodies. The cultured PVDF membranes were incubated with suitable horseradish peroxidase (HRP)-conjugated secondary antibody (1:2 000) at 37 °C for 2 h. Finally, the antigen-antibody complex was observed using an ECL kit. Relative expression was quantified using ImageJ with GAPDH as an internal parameter.

### 1.2. Table S1 Primers of RT-qPCR

| Gene name            | Forward (5'-3')            | Reverse (5'-3')        |
|----------------------|----------------------------|------------------------|
| <i>β-actin (Rat)</i> | GCTGTGCTATGTTGCCCTAGA<br>C | CCGCTCATTGCCGATAGTGATG |
| <i>mTOR</i>          | GCAATGGGCACGAGTTTGTT       | AGTGTGTTACCAGGCCAAA    |
| <i>PI3K</i>          | ACACGGGGGCATTCAAAGAT       | GTCGTTGTCCTGTCACCTA    |
| <i>AKT</i>           | AAGGACCCTACACAGAGGCT       | AAGGTGGGCTCAGCTTCTTC   |
| <i>ERK</i>           | CTTGGCCTCTCTCGCTACC        | CAGGTATCTTCCCTCCCAAGG  |

## 2. Figures and schemes Legends

**A**

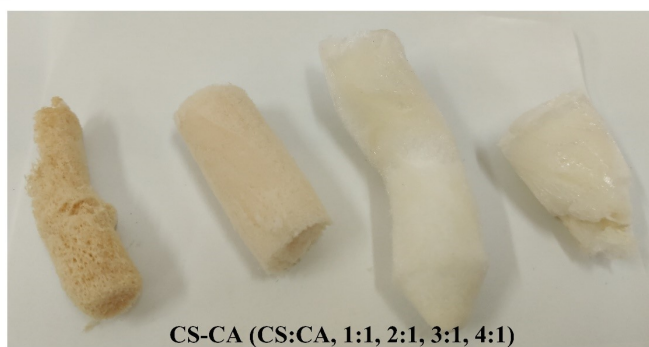

**B**

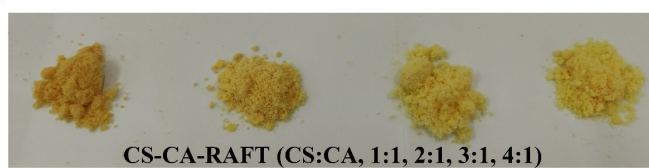

**C**

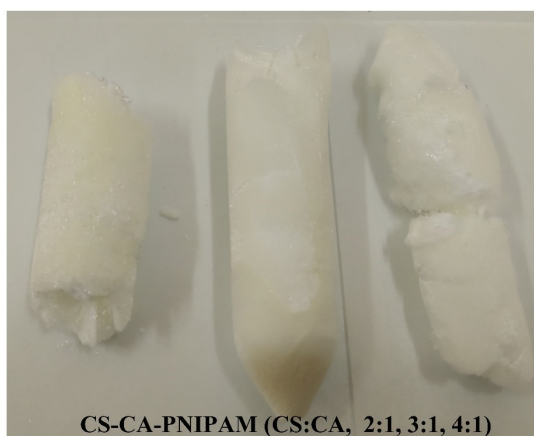

Fig. S1 Digital photo of important intermediates.

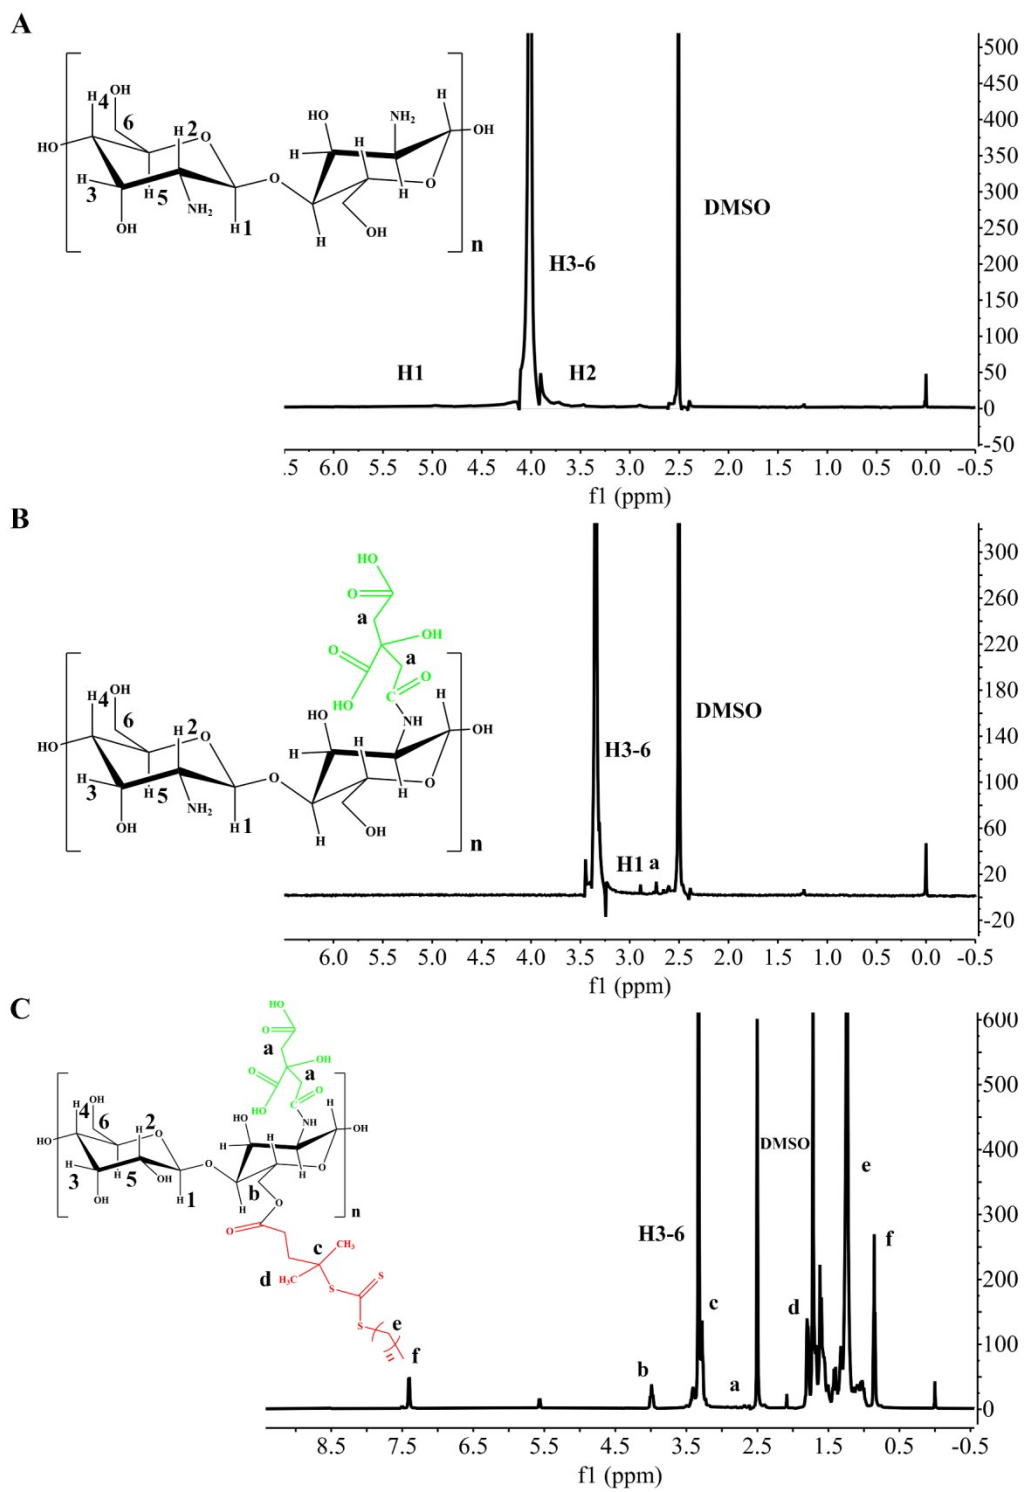

Fig. S2  $^1\text{H}$  NMR spectra of intermediate products.

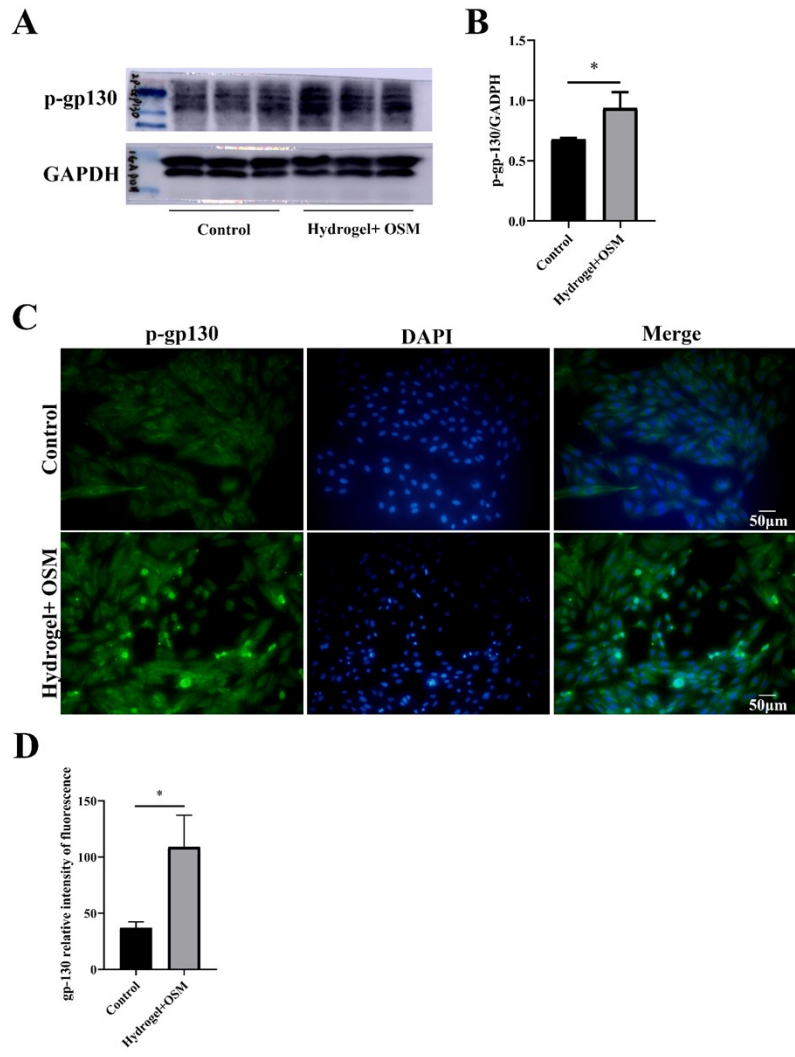

Fig. S3 OSM-loaded injectable hydrogel bioactivity test diagram.

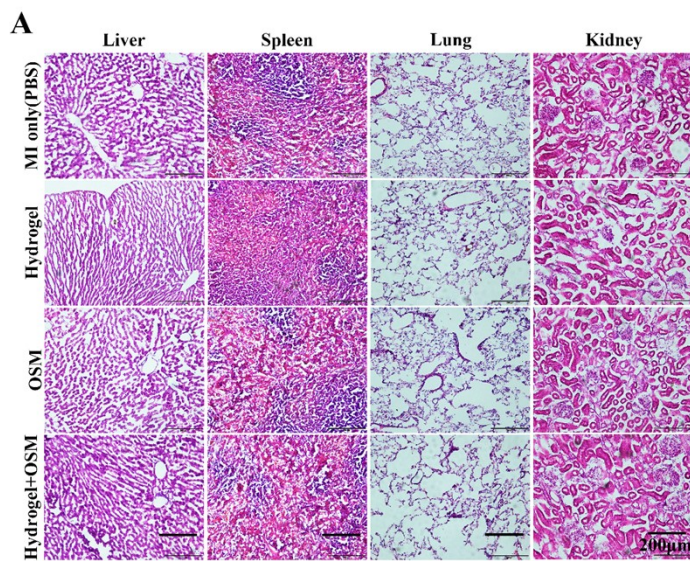

Fig. S4 Vital organs were observed by HE staining.
